# Supplementary material for: A recombinant bovine adenoviral mucosal vaccine expressing mycobacterial antigen-85B generates robust protection against tuberculosis in mice
Source: PubMed Central journal article supplement — Cell Rep Med. 2021 Aug 17;2(8):100372. doi: 10.1016/j.xcrm.2021.100372 (PMC8385328; doi:10.1016/j.xcrm.2021.100372), 2021-08-17
Supplement: mmc1.pdf [file mmc1.pdf]

**Cell Reports Medicine, Volume 2**

**Supplemental information**

**A recombinant bovine adenoviral mucosal vaccine  
expressing mycobacterial antigen-85B generates  
robust protection against tuberculosis in mice**

**Arshad Khan, Ekramy E. Sayedahmed, Vipul K. Singh, Abhishek Mishra, Stephanie Dorta-Estremera, Sita Nookala, David H. Canaday, Min Chen, Jin Wang, K. Jagannadha Sastry, Suresh K. Mittal, and Chinnaswamy Jagannath**

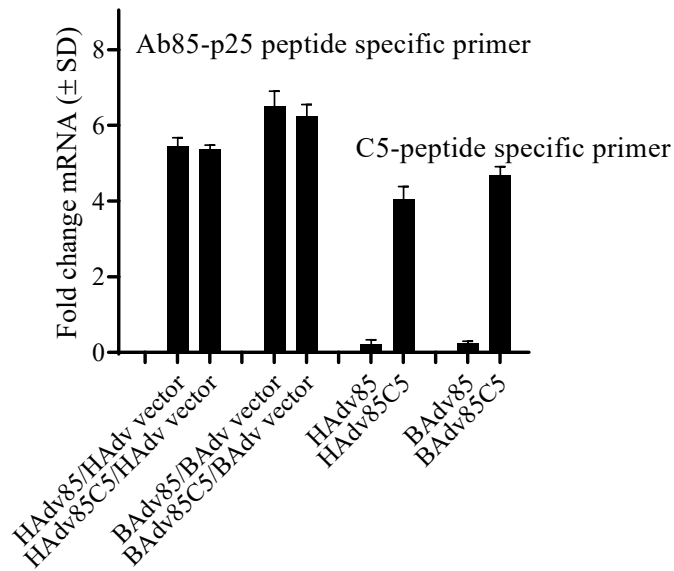

**Supplemental Figure- 1a:** qPCR validation of Antigen 85B derived p25 and CFP-10 derived C5 related to Fig.1. Primers shown in *Supplemental Fig.8*.

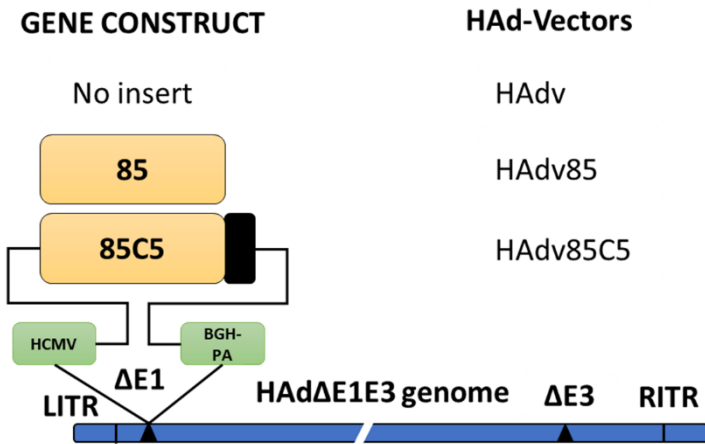

**Supplemental Figure- 1b:** Gene cassette of HAdv constructs related to Fig.1.

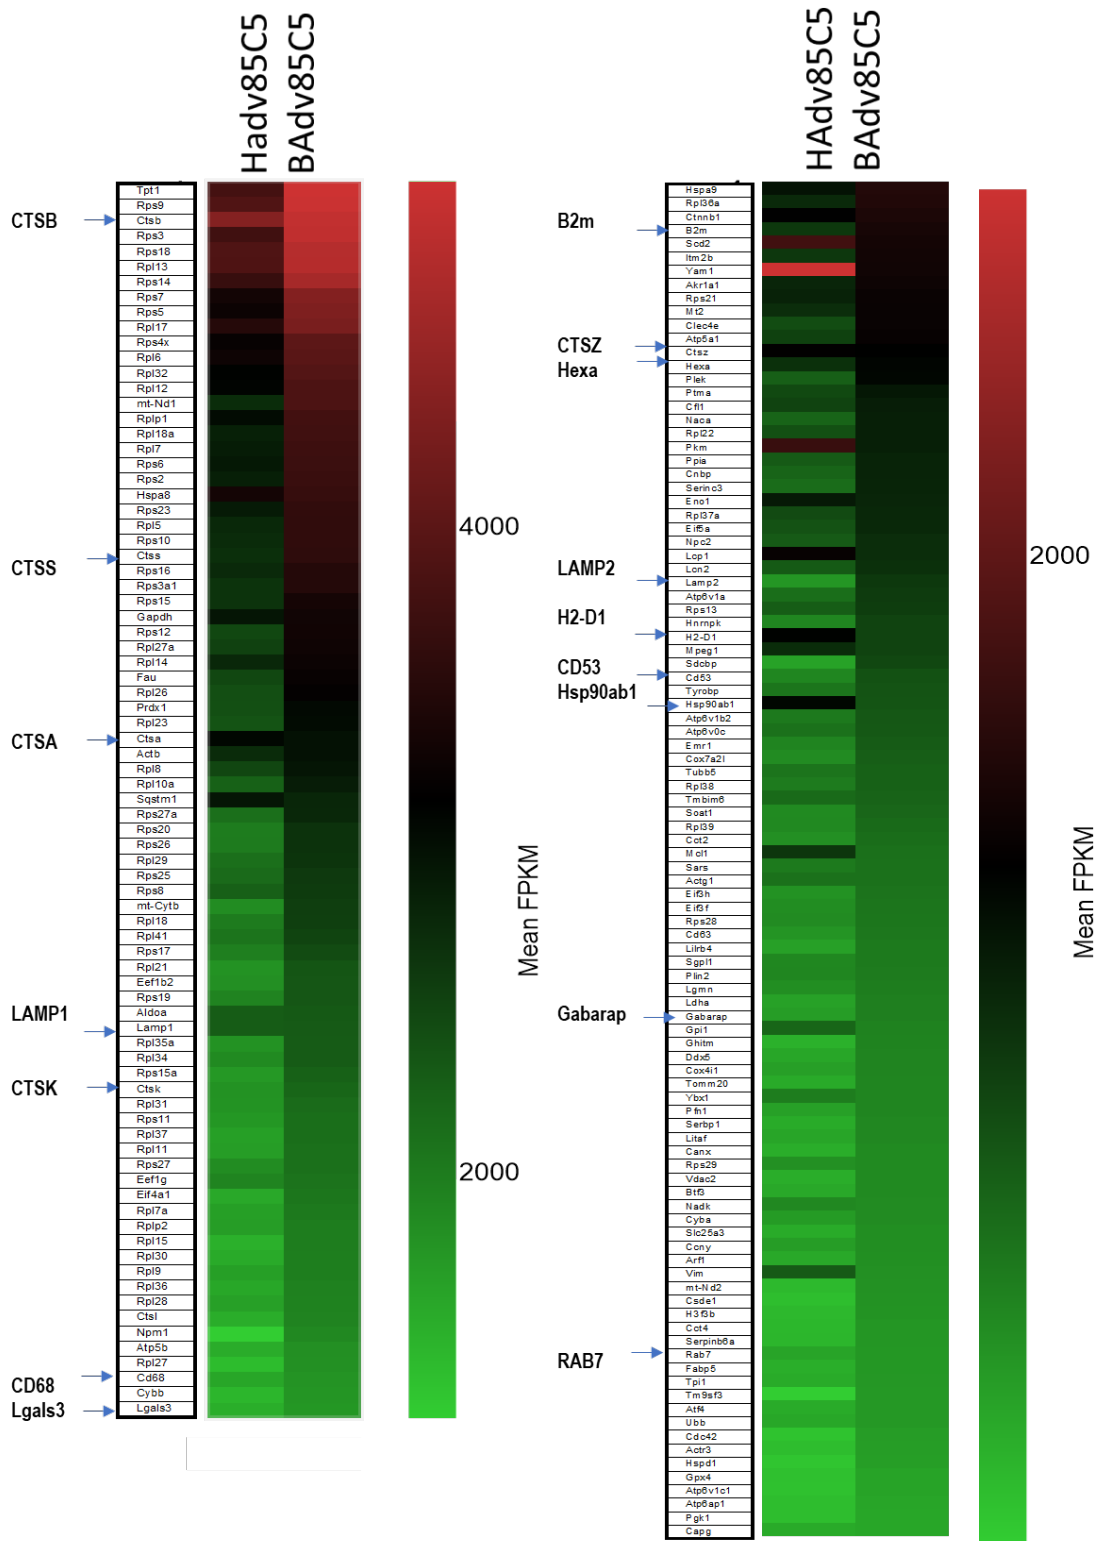

**Supplemental Figure- 2: DEGs of HAdv<sup>85C5</sup> in wt-DCs vs. BAdv<sup>85C5</sup> related to Fig.2.**



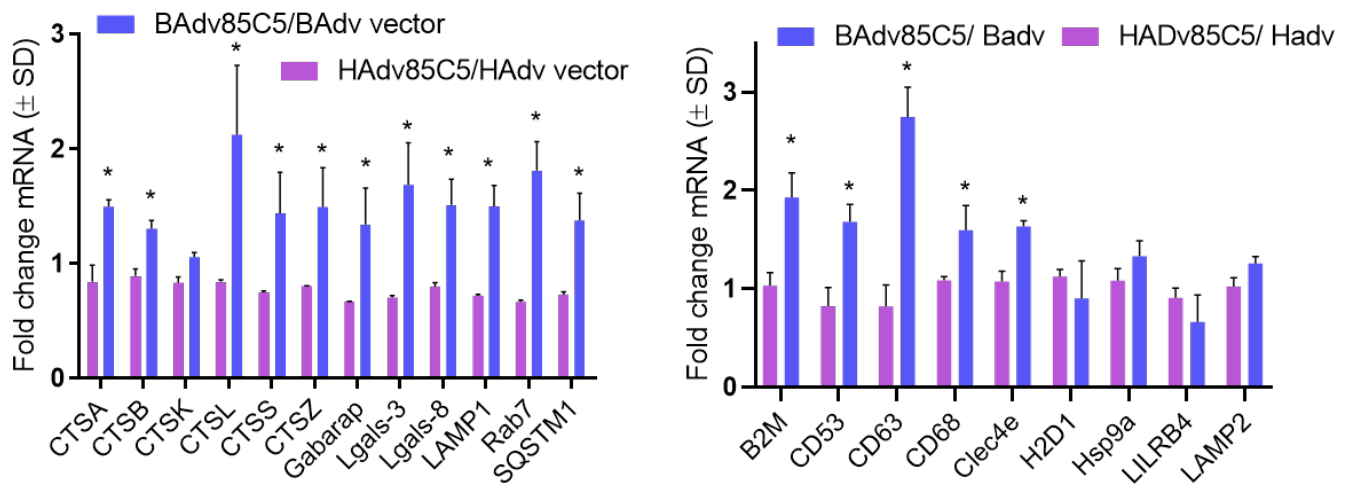

**Supplemental Figure- 4:** qPCR validation of genes in BAdv<sup>85C5</sup> infected DCs vs. HAdv<sup>85C5</sup> infected DCs, related to Figs. 2.

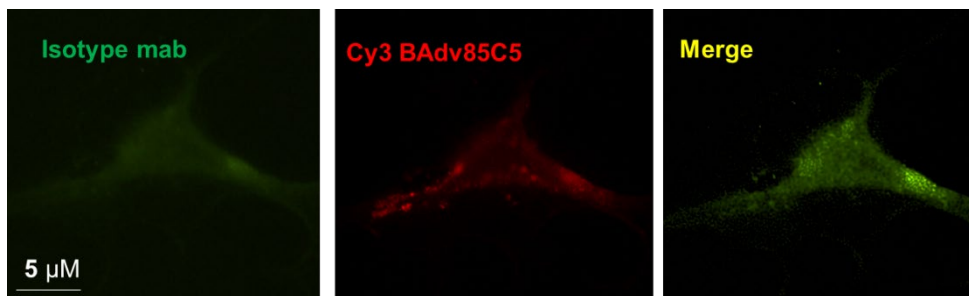

**Supplemental Figure- 5:** Isotype controls related to Fig.3.

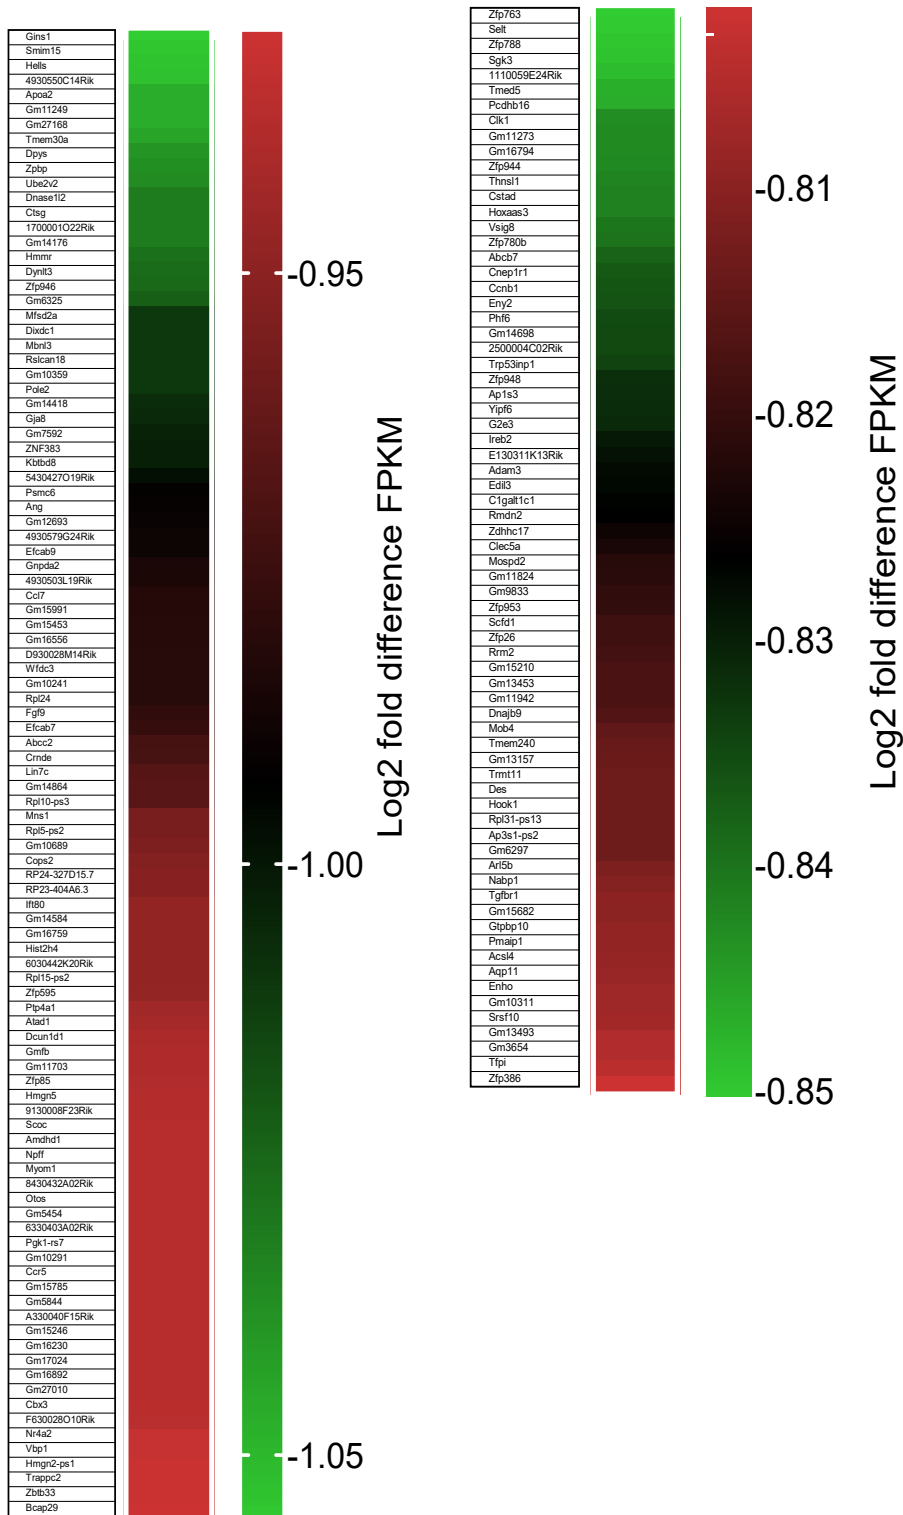

**Supplemental Figure- 6:** DEGs of BAdv<sup>85C5</sup> in C57Bl/6 derived wt-macrophages compared to HAdv<sup>85C5</sup>, related to Fig.2.

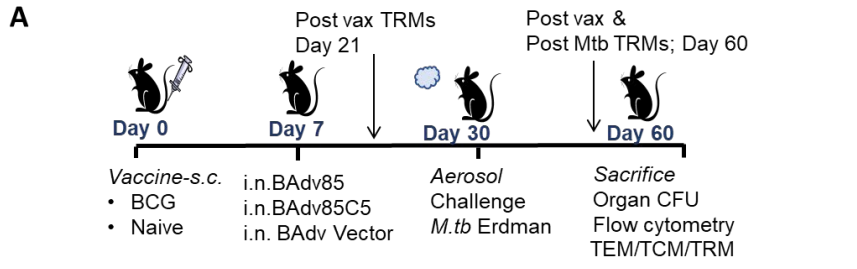

**B** TRMs Lungs post vax      TRMs Lungs post Mtb challenge

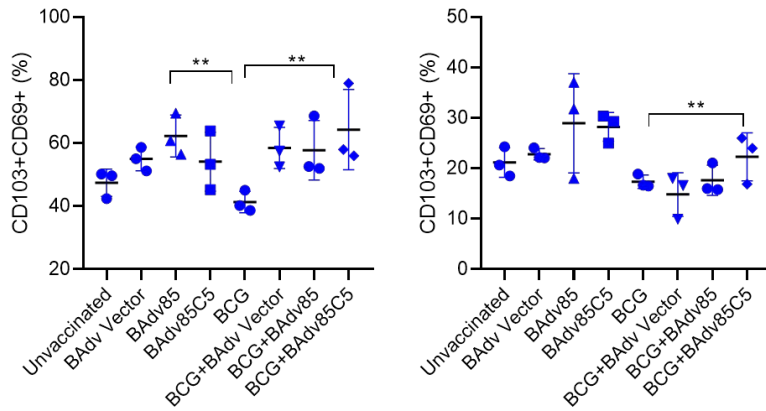

**C** TRMs Spleens post vax      TRMs Spleens post Mtb challenge

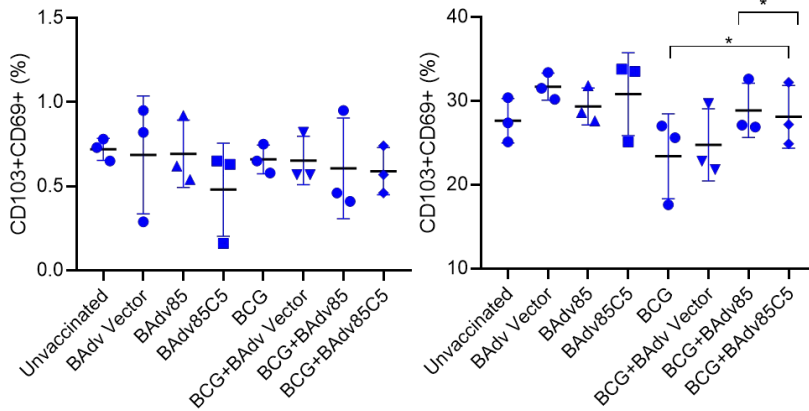

**Supplemental Figure- 7:** T<sub>RM</sub>s (CD4<sup>+</sup>CD103<sup>+</sup>CD69<sup>+</sup>) on day 21 for post vaccination and day 60 post Mtb challenge, related to Fig. 7.

| <u>GENE</u>    | <u>Forward primer 5'-&gt;3'</u> | <u>Reverse primer 5'-&gt;3'</u> |
|----------------|---------------------------------|---------------------------------|
| Ag85b          | GATATCGGATCCGCCACC              | GCGGCCGCGATATC                  |
| Ag85bC5        | GATATCGGATCCGCCACC              | GCGGCCGCGATATC                  |
| $\beta$ -Actin | CATTGCTGACAGGATGCAGAAGG         | TGCTGGAAGGTGGACAGTGAGG          |
| CTSA           | TGTTTCGGAAGGCTCTCCACATC         | CACATCTCCGTTGTAGAGCAGG          |
| CTSB           | AGTCAACGTGGAGGTGTCTGCT          | GTAGACTCCACCTGAAACCAGG          |
| CTSK           | AGCAGAACGGAGGCATTGACTC          | CCCTCTGCATTTAGCTGCCTTTG         |
| CTSL           | GGAAAATGGAGGTCTGGACTCG          | GTGTCATTAGCCACAGCGAACTC         |
| CTSS           | GCATAGAGGCAGACGCTTCCTA          | CCACTGCTTCTTTCAGGGCATC          |
| CTSZ           | GTGTCAGCAACGATGGCATCGA          | CCTTGTAGGTGCTGGTCACGAT          |
| GABARAP        | CAAAGAGGAGCATCCGTTTCGAG         | TTGTCCAGGTCTCCTATCCGAG          |
| GAPDH          | CATCACTGCCACCCAGAAGACTG         | ATGCCAGTGAGCTTCCCCTTCAG         |
| LGALS3         | AACACGAAGCAGGACAATAACTGG        | GCAGTAGGTGAGCATCGTTGAC          |
| LGALS8         | GAGGAGATCACCTACGACATGC          | CGTACAGCAGAACATGCCTTCC          |
| RAB7           | GAGCGGACTTTCTGACCAAGGA          | CAATCTGCACCTCTGTAGAAGGC         |
| LAMP1          | CCAGGCTTTCAAGGTGGACAGT          | GGTAGGCAATGAGGACGATGAG          |
| Sqstm1         | GCTCTTCGGAAGTCAGCAAACC          | GCAGTTTCCCGACTCCATCTGT          |

Fold change is calculated by using  $2^{-\Delta\Delta Ct}$  method

Briefly,

$\Delta Ct = Ct$  (gene of interest) –  $Ct$  (housekeeping gene)

$\Delta\Delta Ct = \Delta Ct$  (treated sample) –  $\Delta Ct$  (untreated sample)

Fold change =  $2^{-\Delta\Delta Ct}$

**Supplemental Figure- 8:** qPCR primers used in this study; related to *Figs.5 and 6*.
